# Supplementary material
Source: PubMed Central journal article supplement (PMC7744432)
Supplement: NIHMS1642446-supplement-1.pdf [file NIHMS1642446-supplement-1.pdf]

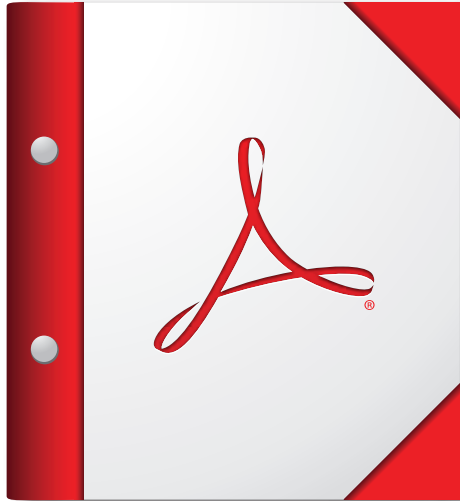

**For the best experience, open this PDF portfolio in  
Acrobat X or Adobe Reader X, or later.**

[Get Adobe Reader Now!](#)
